# Supplementary material for: Pd nanoparticles supported on a covalent triazine-based framework material: an efficient and highly chemoselective catalyst for the reduction of nitroarenes
Source: Royal Society of Chemistry journal article supplement (doi:10.1039/c8nj01404c), 2018-01-01
Supplement: c8nj01404c1.pdf [file c8nj01404c1.pdf]

## New Journal of Chemistry

ELECTRONIC SUPPORTING INFORMATION (ESI)

**Pd nanoparticles supported on covalent triazine-based framework  
material: An efficient and high chemoselective catalyst for the reduction  
of nitroarenes**

Jie Li, Lihong Zhang, Xiaotong Liu, Ningzhao Shang\*, Shutao Gao, Cheng Feng, Chun Wang\*,

Zhi Wang

*College of Science, Hebei Agricultural University, Baoding 071001, China*

## Experimental section

Cyanuric chloride, melamine, triethylamine, *N,N*-dimethylformamide (DMF), palladium (II) chloride ( $\text{PdCl}_2$ ), and sodium borohydride ( $\text{NaBH}_4$ , 96%) were purchased from Aladdin Chemicals Co. Ltd. (Shanghai, China). Formic acid (FA,  $\text{HCOOH}$ , 88%) and ammonium formate (AF,  $\text{HCOONH}_4$ ,  $\geq 95\%$ ) were gained from Huaxin Co. Ltd. (Baoding, China). All chemical reagents were used as commercially available and no further purification.

The X-ray diffraction (XRD) patterns of the samples were conducted through a Rigaku D/max 3500 X-ray diffractometer (Dandong, China) using  $\text{Cu K}\alpha$  radiation (30 kV, 25 mA) in the range  $2\theta = 2^\circ\text{--}80^\circ$ . X-ray photoelectron spectroscopy (XPS) spectra were acquired with an ESCA Lab 250 (Thermo) spectrometer using a monochromatic  $\text{Al K}\alpha$  source (1486.6 eV). Transmission electron microscopy (TEM) using a JEOL model JEM-2011(HR) (Tokyo, Japan) at 200 kV. The Brunauer–Emmett–Teller (BET) surface areas were determined from the  $\text{N}_2$  adsorption at 77 K using V-Sorb 2800P (Jinaipu, China). GC analyses were carried out on a Shimadzu GC-2014-C series gas chromatograph (Shimadzu, Japan) equipped with a flame ionization detector (FID) and a split/splitless injector. All the separations were performed on a HP-5 capillary column (30 m  $\times$  0.25 mm i.d.  $\times$  0.25  $\mu\text{m}$  film thickness) (WondaCap5) was employed to identify all reaction products. The products were characterized by  $^1\text{H}$  NMR (300 MHz) spectra.

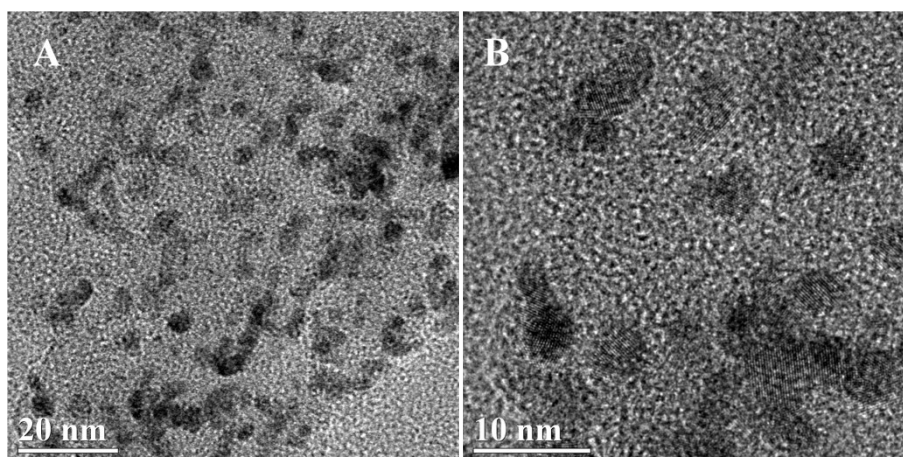

**Fig. S1.** The TEM images of Pd@CTF (A) and reused of Pd@CTF (B).

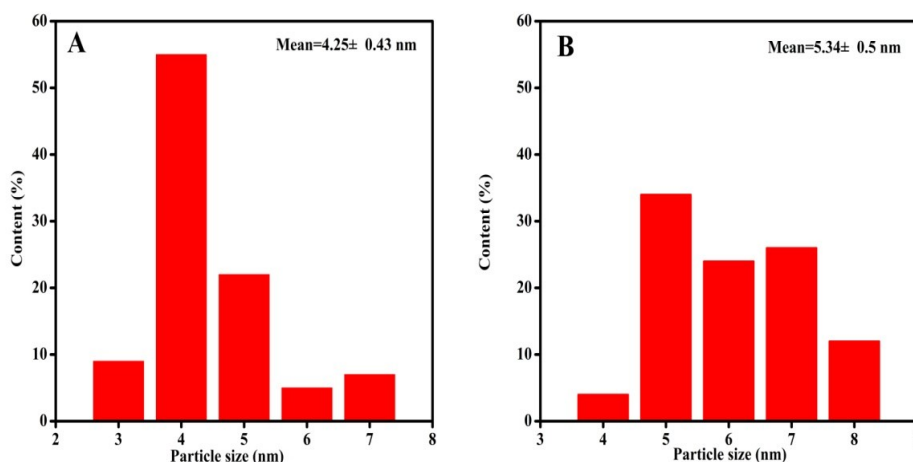

**Fig. S2.** The particles size of Pd@CTF (A) and reused of Pd@CTF(B).

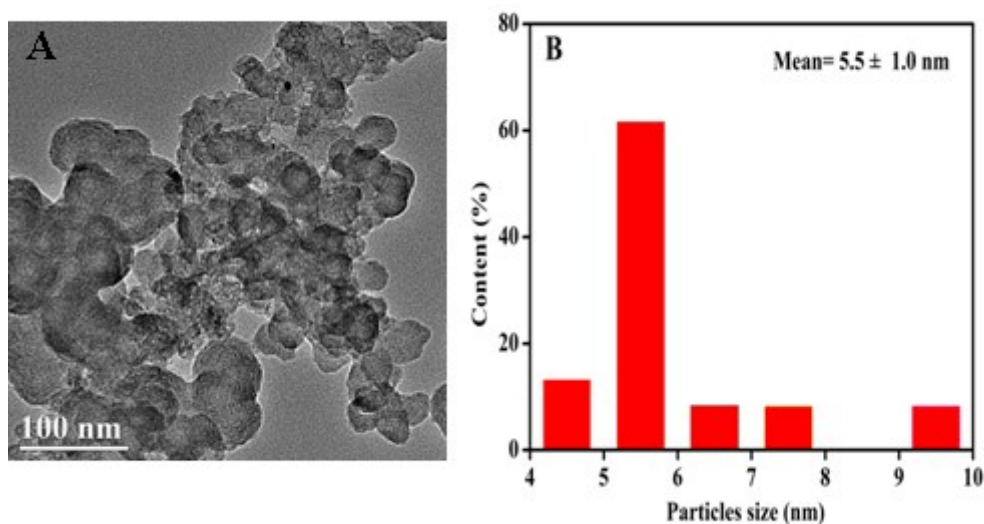

**Fig. S3.** The TEM image (A) and the particles size (B) of Pd/C.

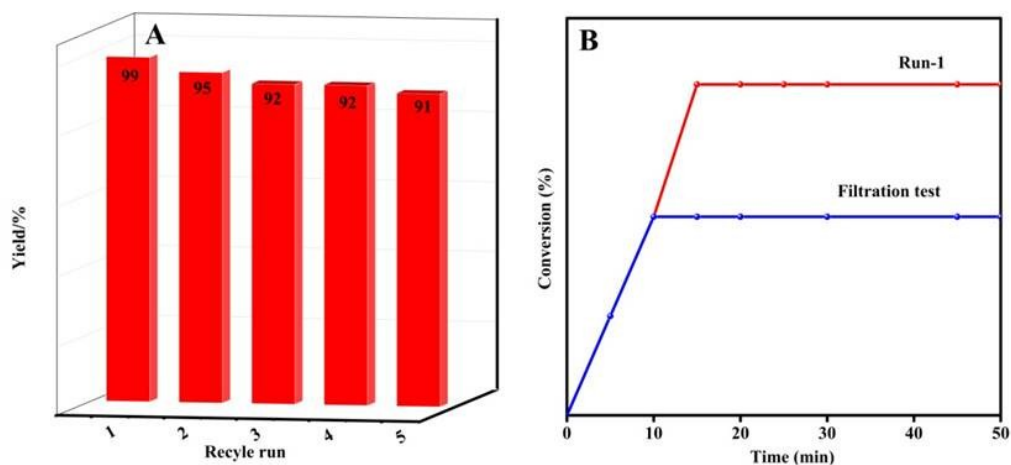

**Fig. S4.** Durability test (A) and the filtration test for the reduction of nitrobenzene over Pd@CTF (B).

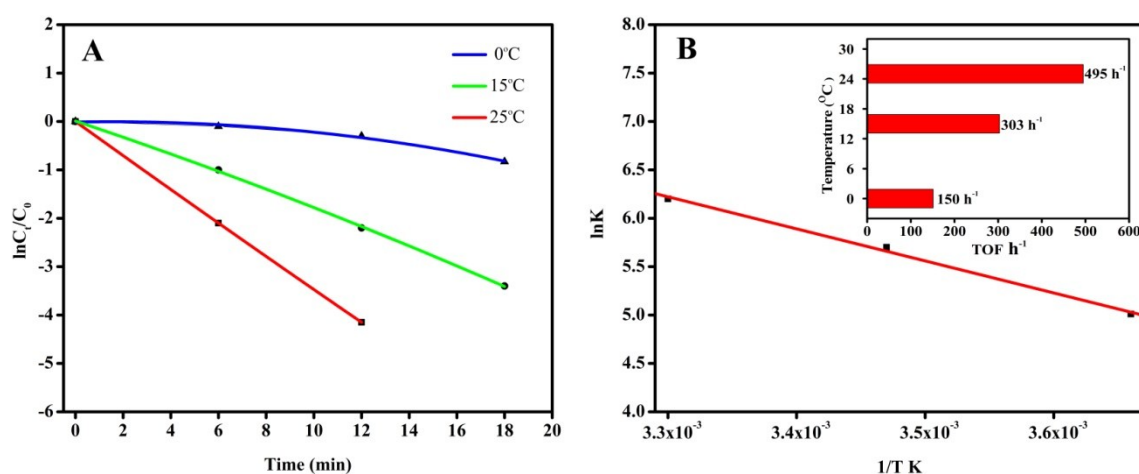

**Fig. S5.** The reaction rate curve (A) and TOF<sub>total</sub> data (B) for the catalytic transfer hydrogenation of nitrobenzene at different temperatures (0°C, 15 °C and 25 °C).

Reaction conditions: 1 mmol nitrobenzene, 1.0 mol% Pd, 5 mL EtOH/H<sub>2</sub>O (v/v = 4:1), 5 mmol FA,

5 mmol NH<sub>4</sub>COOH.

**Table S1** Effect of the type of solvent on the catalytic transfer hydrogenation of nitrobenzene

| Entry | Solvents                           | Time (h) | Con. (%) | Sel. (%) | TOF (h <sup>-1</sup> ) |
|-------|------------------------------------|----------|----------|----------|------------------------|
| 1     | EtOH                               | 0.2      | 99       | 99       | 495                    |
| 2     | EtOH:H <sub>2</sub> O (v/v = 4:1)  | 0.2      | 99       | 99       | 495                    |
| 3     | EtOH:H <sub>2</sub> O (v/v = 3:2)  | 0.22     | 99       | 97       | 441                    |
| 4     | EtOH:H <sub>2</sub> O (v/v = 2: 3) | 0.25     | 99       | 92       | 368                    |
| 5     | EtOH:H <sub>2</sub> O (v/v = 1: 4) | 0.3      | 99       | 89       | 297                    |
| 6     | H <sub>2</sub> O                   | 0.3      | 99       | 85       | 283                    |

Reaction conditions: 1 mmol nitrobenzene, 1.0% mmol Pd, 5 mL solvent, 5 mmol FA, 5 mmol NH<sub>4</sub>COOH, 25°C, GC analysis using *n*-decane as an internal standard.

**Table S2** Various reported catalyst tested for the catalytic transfer hydrogenation into anilines

| Entry | Catalyst                                                                                            | Hydrogen source            | Temp (°C) | Time (h) | TOF[h <sup>-1</sup> ] <sup>[a]</sup> | Ref       |
|-------|-----------------------------------------------------------------------------------------------------|----------------------------|-----------|----------|--------------------------------------|-----------|
| 1     | Au/rutile                                                                                           | HCOOH                      | 60        | 0.67-4   | 25-149                               | [1]       |
| 2     | Fe(BF <sub>4</sub> ) <sub>2</sub> ·6H <sub>2</sub> O/PP <sub>3</sub>                                | HCOOH                      | 40        | 1        | 100                                  | [2]       |
| 3     | [Mo <sub>3</sub> S <sub>4</sub> H <sub>3</sub> (dmpe) <sub>3</sub> ]BPh <sub>4</sub> <sup>[a]</sup> | HCOOH-Et <sub>3</sub> N    | 70        | 18       | 0.54-1.85                            | [3]       |
| 4     | Fe-MMIO <sup>[c]</sup>                                                                              | HCOOH                      | 70        | 0.67-1   | 20-25                                | [4]       |
| 5     | γ-Fe <sub>2</sub> O <sub>3</sub> @HAP-Pd <sup>[b]</sup>                                             | HCOONH <sub>4</sub>        | 60        | 3        | 35-30                                | [5]       |
| 6     | Fe <sub>2</sub> O <sub>3</sub> /NGr@C                                                               | HCOOH-Et <sub>3</sub> N    | 120       | 20-24    | 0.74-0.95                            | [6]       |
| 7     | Pd@CTF                                                                                              | HCOOH-NH <sub>4</sub> COOH | 25        | 0.2-2.5  | 36.4-495                             | This work |

[a] dmpe = 1,2-(bis)dimethylphosphinoethane.

[b] HAP = hydroxyapatite.

[c] MMIO = micro-mesoporous iron oxide.

The spectroscopic data of the products.

1. Aniline (Table 2, Entry 1), <sup>1</sup>H-NMR (300 MHz, CDCl<sub>3</sub>): δ 3.70 (br, 1H), 6.77 (d, 2H), 6.87 (t, 1H), 7.30 (d, 2H).
2. 2-Tuluidine (Table 2, Entry 2), <sup>1</sup>H-NMR (300 MHz, CDCl<sub>3</sub>): δ 7.24 (t, 2H), 6.92 (t, 1H), 6.80 (d, 1H), 3.68 (br, 2H), 2.30 (s, 3H).

3. 4-Tuluidine (Table 2, Entry 3),  $^1\text{H-NMR}$  (300 MHz,  $\text{CDCl}_3$ ):  $\delta$  7.05 (d, 2H), 6.67 (d, 2H), 3.54 (br, 2H), 2.31 (s, 3H).
4. 2-Aminophenol (Table 2, Entry 4),  $^1\text{H-NMR}$  (300 MHz,  $\text{CDCl}_3$ ):  $\delta$  4.49 (bs, 2H), 6.36-6.42(m, 1H), 6.51-6.65 (m, 3H), 8.95 (bs, 1H).
5. 4-Aminophenol (Table 2, Entry 5),  $^1\text{H-NMR}$  (300 MHz,  $\text{CDCl}_3$ ):  $\delta$  4.00 (bs, 2H), 6.31-6.39 (m, 4H), 8.95 (bs, 1H).
6. 4-Aminophenyl-methano (Table 2, Entry 6),  $^1\text{H-NMR}$  (300 MHz,  $\text{CDCl}_3$ ):  $\delta$  7.13 (d, 2H), 6.65 (d, 2H), 4.50 (s, 2H), 3.08 (br, 2H).
7. 1,4-Phenylenediamine (Table 2, Entry 7),  $^1\text{H-NMR}$  (300 MHz,  $\text{CDCl}_3$ ):  $\delta$  6.57 (s, 4H), 3.20 (br, 4H).
8. 4-Anisidine (Table 2, Entry 8),  $^1\text{H-NMR}$  (300MHz,  $\text{CDCl}_3$ ):  $\delta$  6.76 (d, 2H), 6.65 (d, 2H), 3.74 (s, 3H), 3.32 (br, 2H).
9. 4-Aminotenzaldehyde (Table 2, Entry 9),  $^1\text{H-NMR}$  (300 MHz,  $\text{CDCl}_3$ ):  $\delta$  2.50 (s, 3H), 4.16 (brs. 2H), 6.63 (d, 2H), 7.79 (d, 2H);
10. 4- Amino-acetophenone (Table 2, Entry 10),  $^1\text{H-NMR}$  (300 MHz,  $\text{CDCl}_3$ ):  $\delta$  7.84 (m, 2H), 6.68 (m, 2H), 4.11 (bs, 3H);
11. 2-Aminoacetophenone (Table 2, Entry 11),  $^1\text{H-NMR}$  (300 MHz,  $\text{CDCl}_3$ ):  $\delta$  7.04 (m, 2H), 6.5 (m, 2H), 4.23 (bs, 3H);
12. 3-Aminoacetophenone (Table 2, Entry 12),  $^1\text{H-NMR}$  (300 MHz,  $\text{CDCl}_3$ ):  $\delta$  7.34 (m, 2H), 6.27(m, 2H), 4.3(bs, 3H);
13. 1-Aminonaphthalene (Table 2, Entry 13),  $^1\text{H-NMR}$  (300 MHz,  $\text{CDCl}_3$ ):  $\delta$  4.01(br, 2H), 6.82 (d, 1H), 7.33 (m, 2H), 7.48 (m, 2H), 7.84 (m, 2H);
14. 4-Aminobenzonitrile (Table 2, Entry 14),  $^1\text{H-NMR}$  (300 MHz,  $\text{CDCl}_3$ ):  $\delta$  3.84(s, 3H), 4.17(br, 2H), 6.61(d, 2H), 7.82(d, 2H);
15. 2-Methyl-2-aminopropane (Table 2, Entry 15),  $^1\text{H-NMR}$  ( $\text{CDCl}_3$ ):  $\delta$  1.53 (d, 6H), 1.62 (s, 3H), 1.38 (m, 2H).

## References

- [1] L. Yu, Q. Zhang, S. S. Li, J. Huang, Y. M. Liu, H. Y. He, Y. Cao, *ChemSusChem*, 2015, **8**, 3029-3035.
- [2] G. Wienhofer, I. Sorribes, A. Boddien, F. Westerhaus, K. Junge, H. Junge, R. Llusar, M. Beller, *J. Am. Chem. Soc.*, 2011, **133**, 12875-12879.
- [3] I. Sorribes, G. Wienhofer, C. Vicent, K. Junge, R. Llusar, M. Beller, *Angew. Chem. Int. Ed.*, 2012, **51**, 7794-7798.

- [4] K. J. Datta, A. K. Rathi, M. B. Gawande, V. Ranc, G. Zoppellaro, R. S. Varma, R. Zboril, *ChemCatChem*, 2016, **8**, 2351-2355.
- [5] P. Zhou, D. Li, S. Jin, S. Chen, Z. Zhang, *J. Am. Chem. Soc.*, 2016, **41**, 15218-15224.
- [6] R. V. Jagadeesh, K. Natte, H. Junge, M. Beller, *ACS Catal.*, 2015, **5**, 1526-1529.
